# Supplementary material
Source: MDPI journal article supplement (https://www.mdpi.com/2673-4605/6/1/10)

CMDWC  
2021

# 1st Corrosion and Materials Degradation Web Conference

17-19 MAY 2021 | ONLINE

*Influence of waste glass powder addition in the microstructure and durability of mortars in the very long term*

**Rosa María Tremiño, Teresa Real-Herraiz, Viviana Letelier, José Marcos Ortega**

Departamento de Ingeniería Civil, *Universidad de Alicante (Spain)*

Instituto de Matemática Multidisciplinar, *Universidad Politécnica de Valencia (Spain)*

Departamento de Obras Civiles, *Universidad de la Frontera (Chile)*

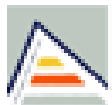

Universitat d'Alacant  
Universidad de Alicante

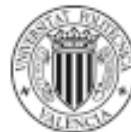

UNIVERSITAT  
POLITÈCNICA  
DE VALÈNCIA

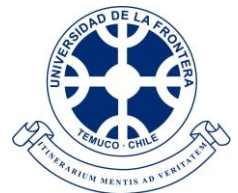

# Outline

**1. Introduction**

**2. Materials and methods**

**3. Results and discussion**

**4. Conclusions**

# Introduction

---

CMDWC  
2021

## Glass powder

- It could be used to **reduce environmental impact** in cement industry
- It could have a good performance as addition for cement-based materials
- Nowadays, the majority of existing studies analyzed the effect of glass powder as addition at relatively short hardening ages

## Objective

**To study the very long-term properties of mortars that incorporate 10% and 20% of glass powder as clinker replacement.**

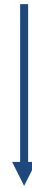

**1500 hardening days**

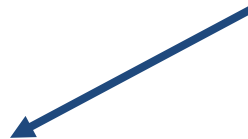

**Microstructure**

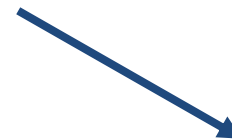

**Durability properties**

# Materials and methods

---

CMDWC  
2021

## Samples preparation

- Materials (mortars):
  - Glass powder from recycling containers
  - Crushing and dry grinding of the glass residues
  - Reference mortar → CEM I 42,5 R
  - Mortars incorporate glass powder as a replacement of cement CEM I 42,5 R
    - GP10 → 10 % of replacement
    - GP20 → 20% of replacement

## Samples preparation

- Samples:
  - Cylindrical → 10 cm diameter and 15 cm height.
  - Chamber at 20 °C and 95% RH during first 24hours
  - After, de-moulded and cut obtaining disks with 1 cm thickness.
  - They were kept in optimum laboratory condition (20°C and 100% RH)
  - Testing age → 1500 hardening days



## Microstructure

### Mercury intrusion porosimetry

- Poremaster-60 GT porosimeter
- Total porosity
- Pore size distributions
- Pieces taken from disks

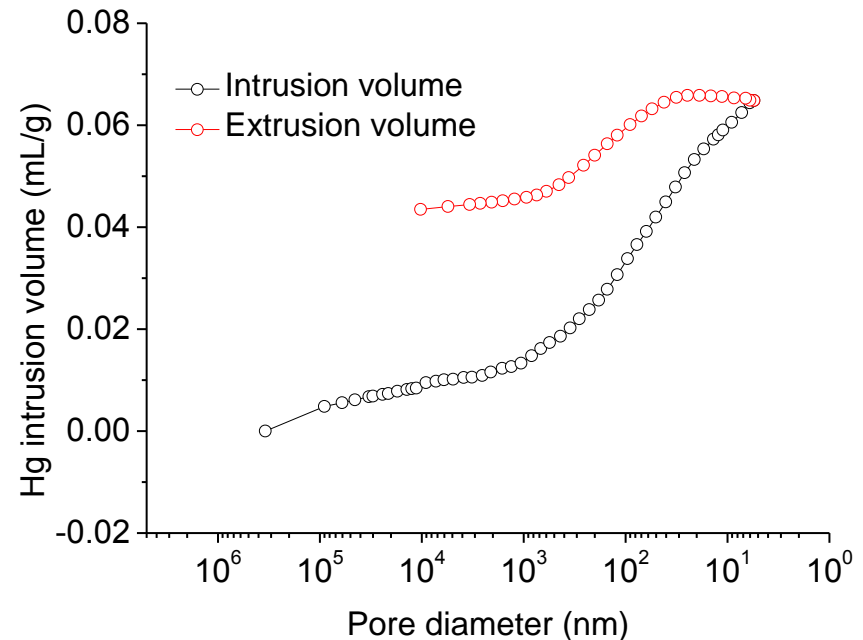

# Materials and methods

## Impedance spectroscopy

Impedance analyzer  
Agilent 4294A  
100 Hz-100 MHz

**Impedance spectra**

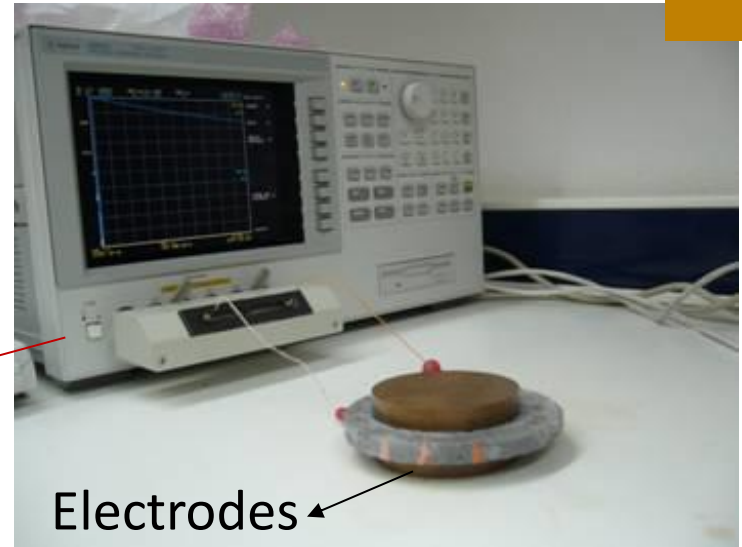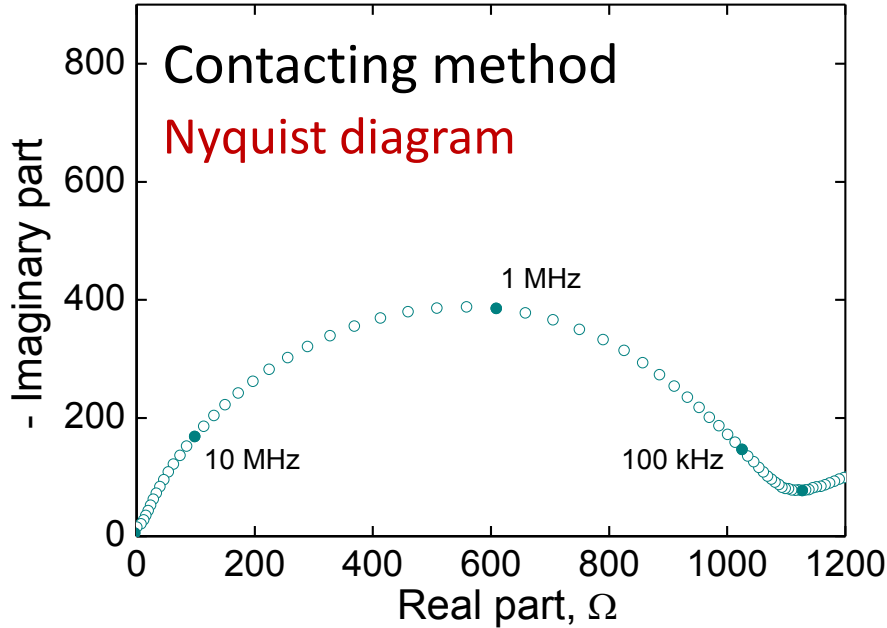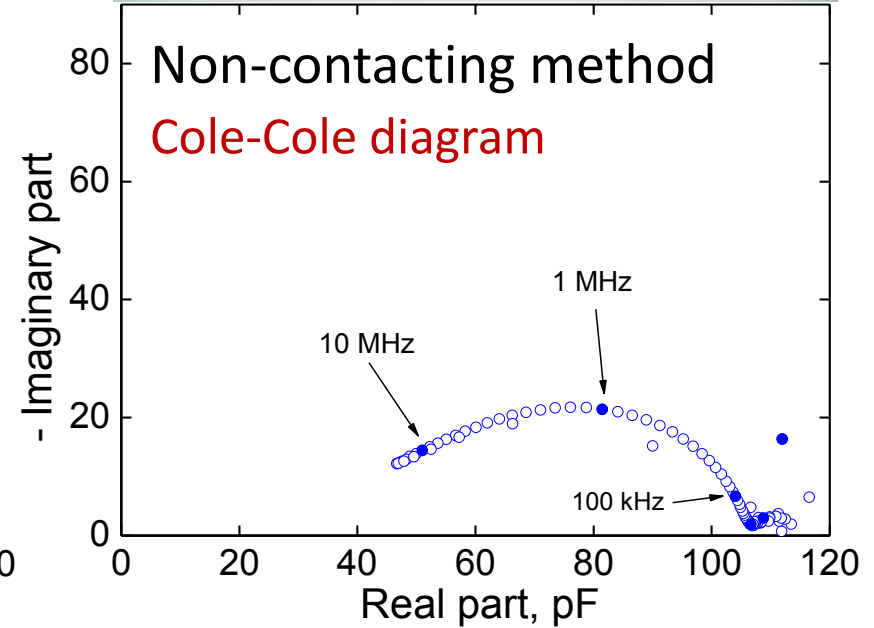

# Materials and methods

## Impedance spectroscopy

**Equivalent circuits** (Cabeza et al. 2002; Sánchez 2002)

Represent **MICROSTRUCTURE**

### Contacting method

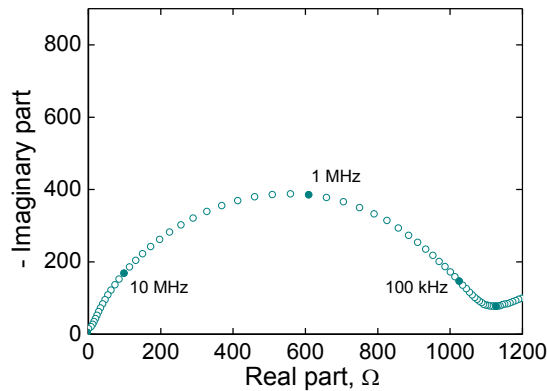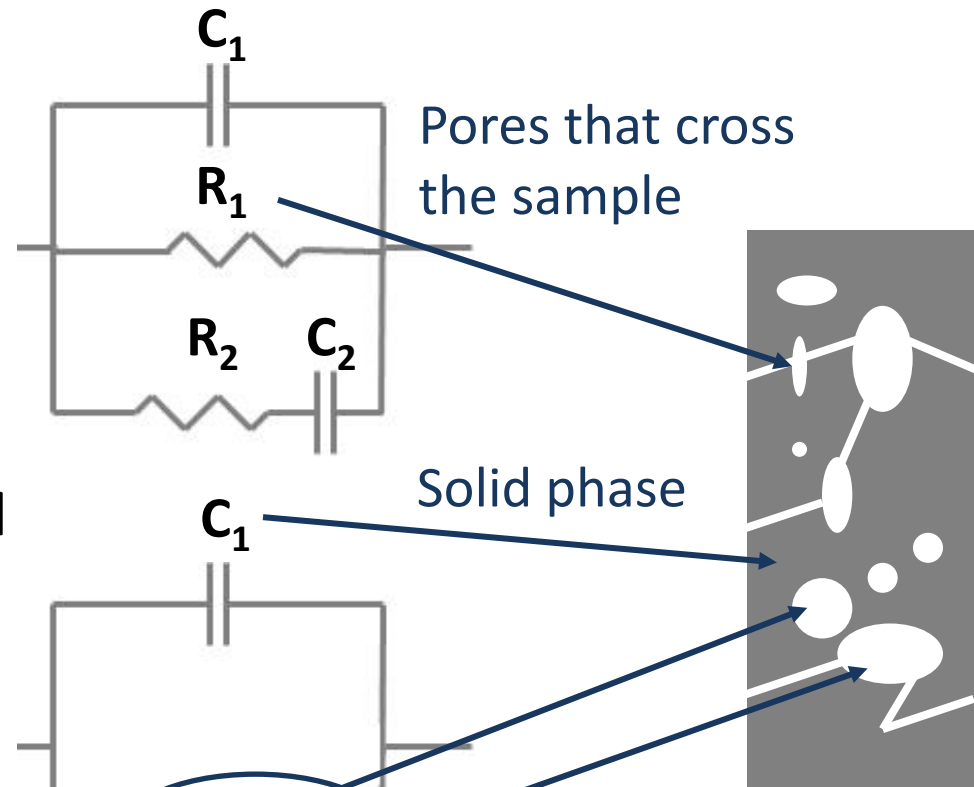

### Non-contacting method

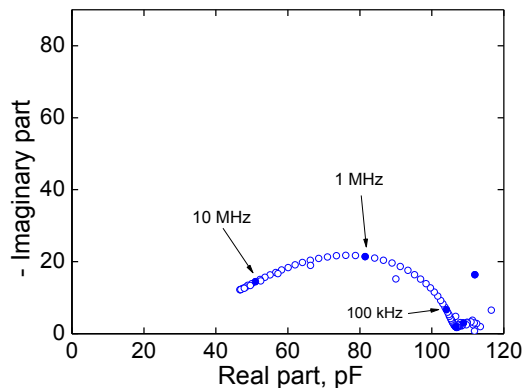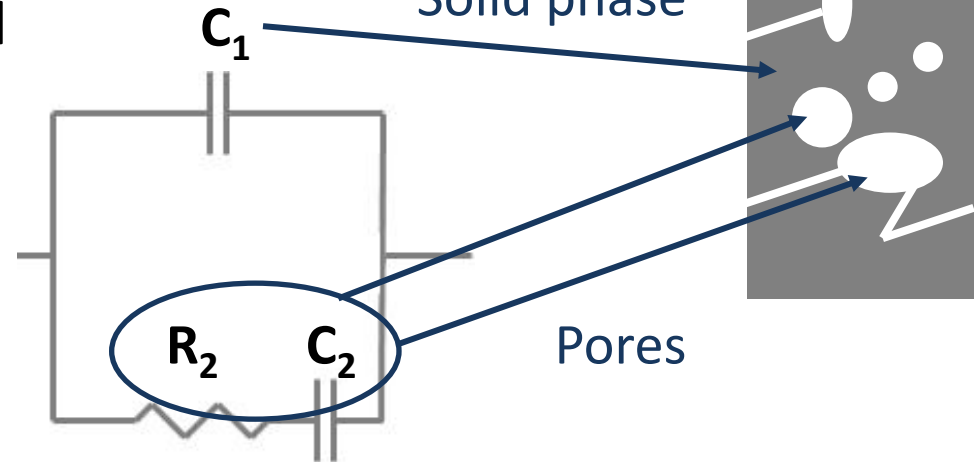

# Materials and methods

## Durability-related parameters

### Absorption after immersion

- ASTM Standard C642-06
- 6 samples were tested

### Chloride diffusion coefficient

- Obtained from electrical resistivity of saturated sample
- Resistivity was calculated from the  $R_1$  impedance spectroscopy of the samples
- Steady-state diffusion coefficient expression

$$D_s = \frac{2 \times 10^{-10}}{\rho}$$

# Results and discussion

---

CMDWC  
2021

# Results and discussion

## Microstructure

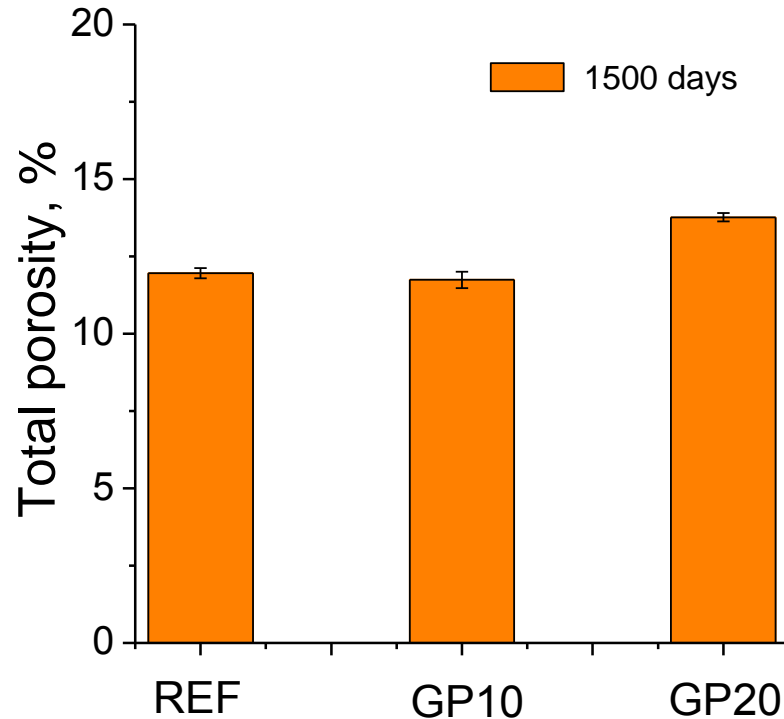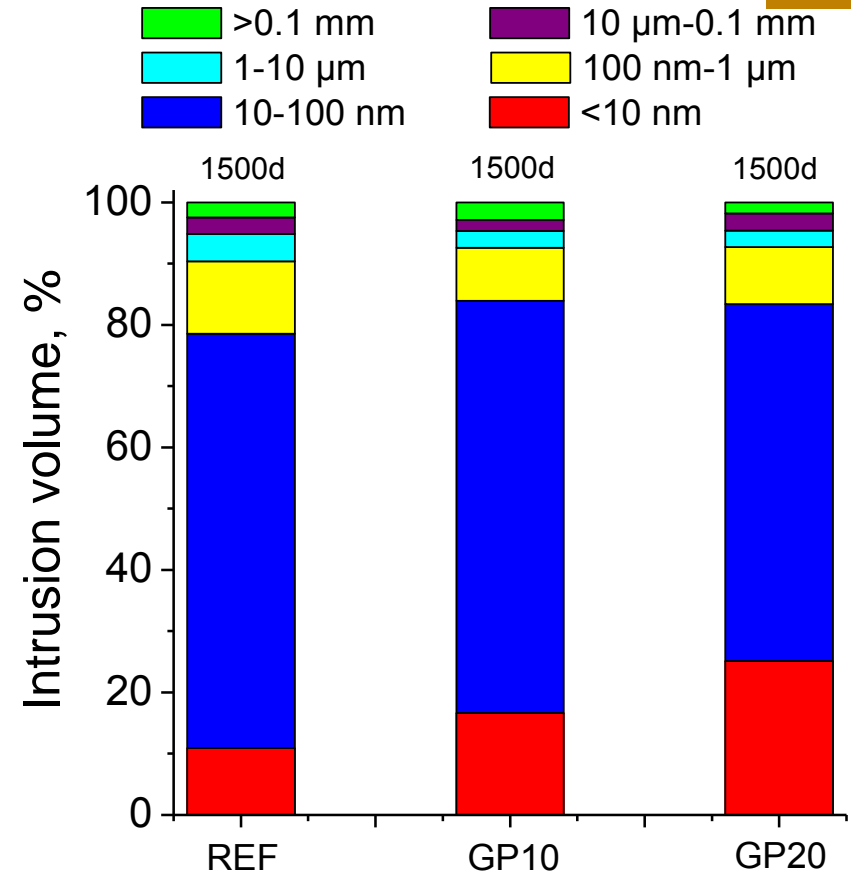

- Porosity GP10 mortar very similar to reference mortar
- Porosity GP20 mortar slight higher than reference mortar
- Porous structure → **More refined in GP10 and GP20**

## Microstructure

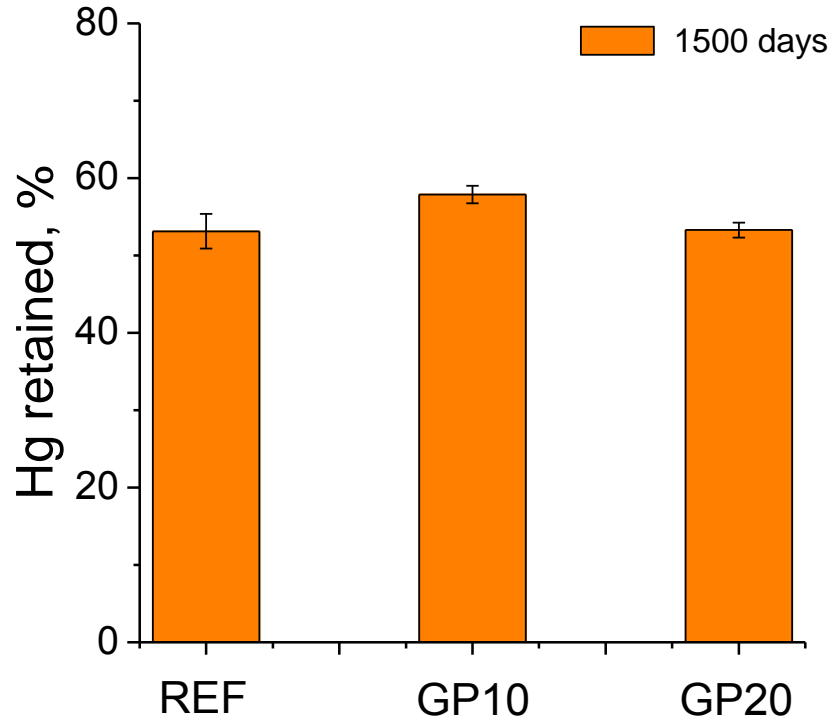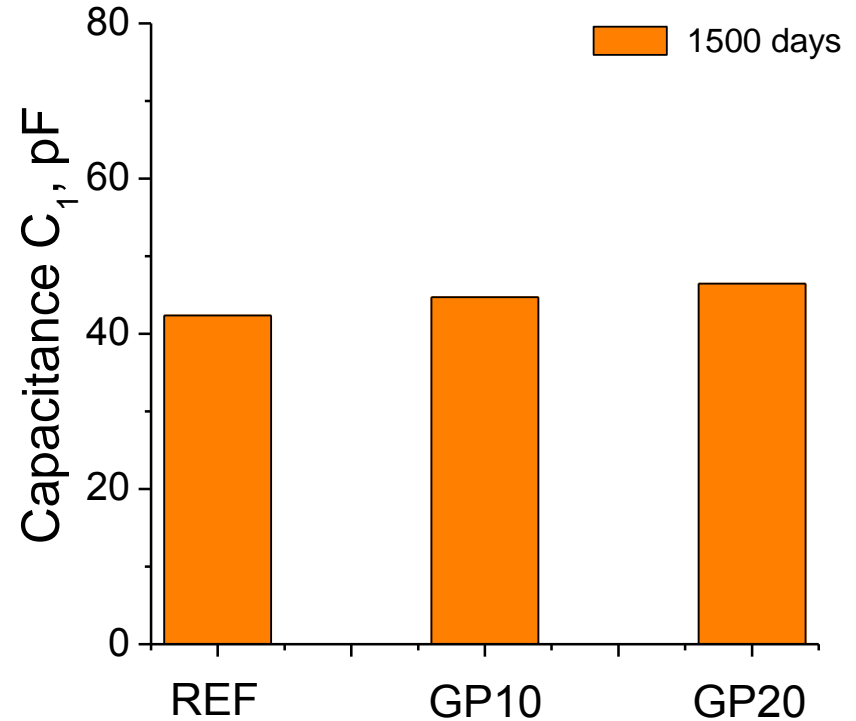

- Greater Hg retained in GP10 mortars
- Capacitance  $C_1$  → Very similar values for GP10, GP20 and REF
- At 1500 hardening days → Very similar solid fraction in GP10, GP20 and REF

# Results and discussion

## Microstructure

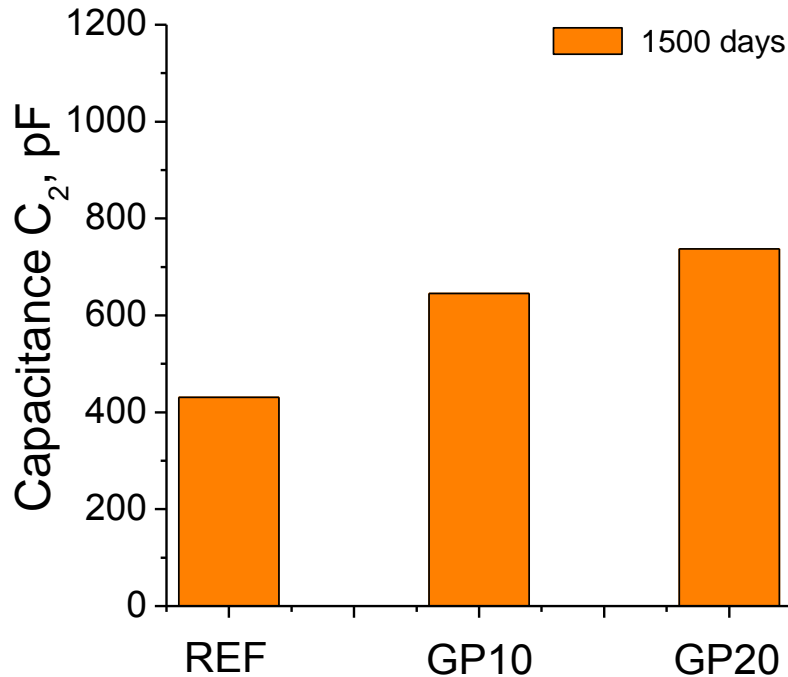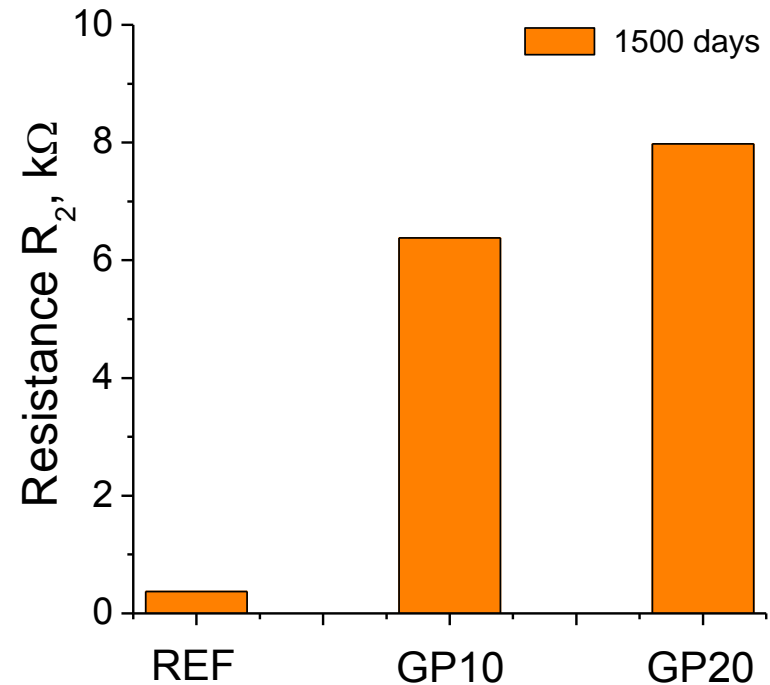

- Higher values for GP10 and GP20 than REF
- Results in keep with the higher pore refinement for GP mortars
- The addition of GP increased the relative volume of smaller pores



# Results and discussion

## Durability-related parameters

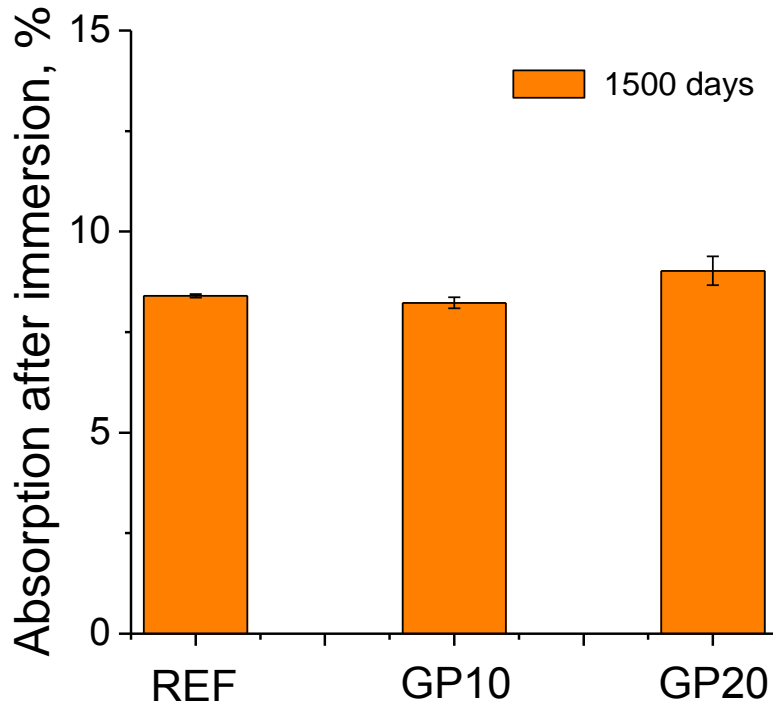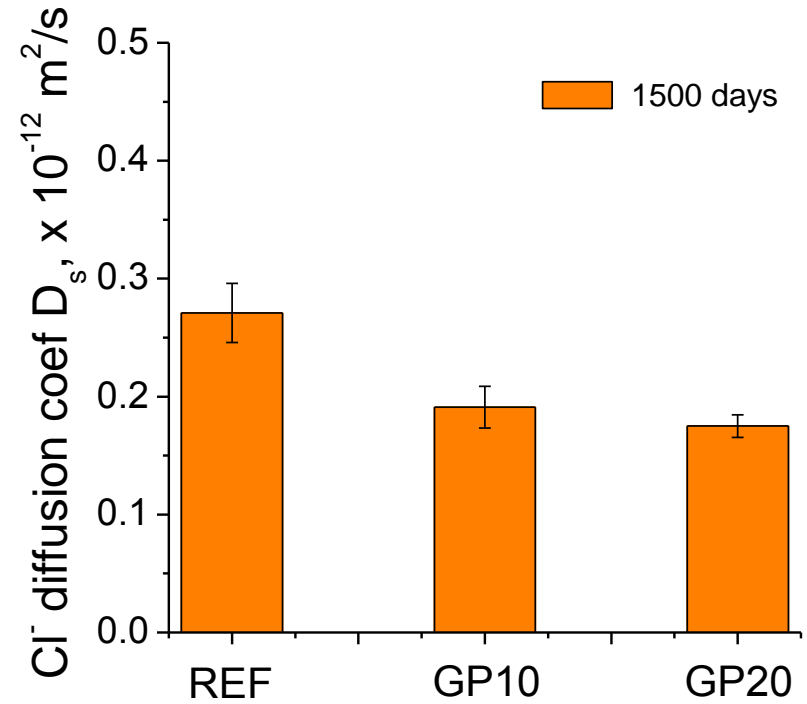

- Absorption % → Very similar for all the binders
- Cl<sup>-</sup> diffusion coef. → GP samples lower values than REF mortars
- **Very good performance of GP addition in Cl<sup>-</sup> ingress resistance**

# Conclusions

---

CMDWC  
2021

## Conclusions

- After 1500 hardening days, mortars with **glass powder** showed a **greater refinement** of the pore structure in comparison with the reference ones. This would show the **positive effects in the very long term of this addition**, produced by the formation of new solid phases as products of pozzolanic reactions of glass powder.
- The global solid fraction and pores volume of the mortars was very similar after 4 years, independently of the incorporation of waste glass powder in the binder, as suggested the total porosity results and impedance spectroscopy capacitance  $C_1$ .

# Conclusions

## Conclusions

- The **durability-related properties** in the very long term analyzed in this work were **generally adequate for GP mortars**, highlighting their **very good performance** regarding **chloride ingress** resistance.

# Acknowledgments

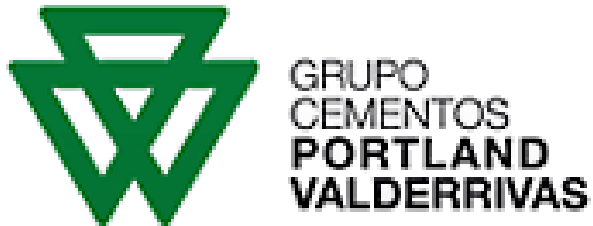

**Cementos Portland  
Valderrivas, S.A.**

CMDWC  
2021

# 1st Corrosion and Materials Degradation Web Conference

17-19 MAY 2021 | ONLINE

*Influence of waste glass powder addition in the microstructure and durability of mortars in the very long term*

**Rosa María Tremiño, Teresa Real-Herraiz, Viviana Letelier, José Marcos Ortega**

Departamento de Ingeniería Civil, *Universidad de Alicante (Spain)*

Instituto de Matemática Multidisciplinar, *Universidad Politécnica de Valencia (Spain)*

Departamento de Obras Civiles, *Universidad de la Frontera (Chile)*



Universitat d'Alacant  
Universidad de Alicante



UNIVERSITAT  
POLITÈCNICA  
DE VALÈNCIA



Supplement: s1 [file s1]
